# Supplementary material for: Oxidative stress induced conformational changes of human serum albumin
Source: Royal Society of Chemistry journal article supplement (doi:10.1039/d4cp00059e), 2024-01-01
Supplement: d4cp00059e1.pdf [file d4cp00059e1.pdf]

### Supporting Information

## Oxidative stress induced conformational changes of Human Serum Albumin

Debdip Brahma, Akshay Narayan Sarangi, Rupal Kaushik, and Amar Nath Gupta<sup>1\*</sup>

<sup>1</sup> Biophysics and Soft Matter Laboratory, Department of Physics, Indian Institute of Technology Kharagpur, 721302, India

\* Corresponding author, *Email address:* [ang@phy.iitkgp.ac.in](mailto:ang@phy.iitkgp.ac.in) (A.N. Gupta)

### S1. UV-Vis spectrum of CuCl<sub>2</sub> & Ascorbic acid

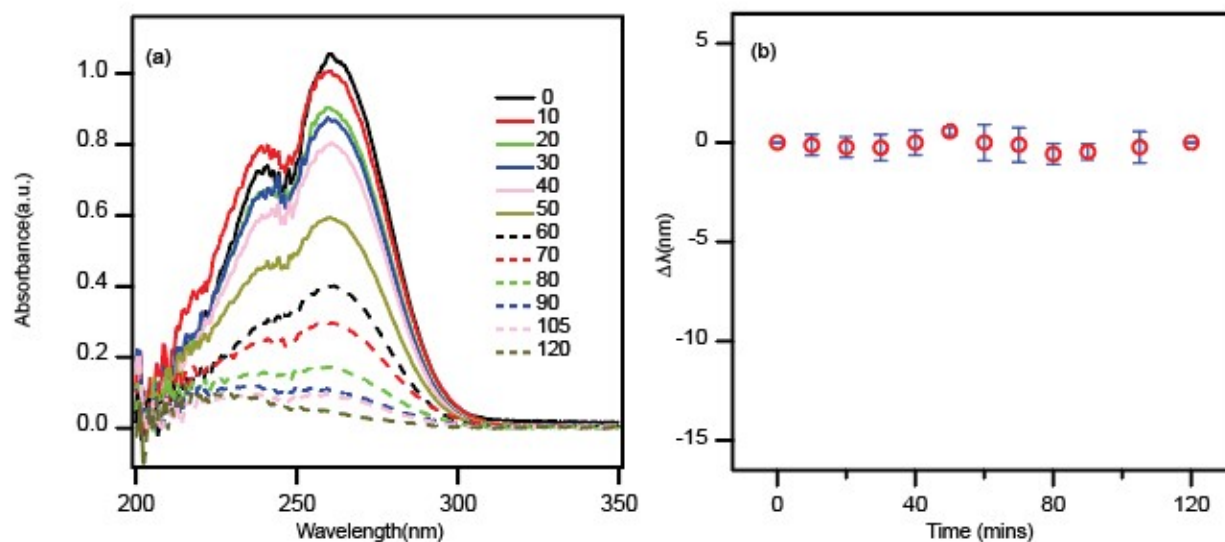

**Fig S1.** (a) UV-vis spectrum of CuCl<sub>2</sub> & Ascorbic acid at various time (in min); (b) Shift in the absorbance maxima in case of CuCl<sub>2</sub> & Ascorbic acid (mean  $\pm$  sd of three independent scans).

Ascorbic acid exhibits an absorption maximum at around  $\sim$ 265 nm (Fig S1. panel a).

The intensity decreases with time, but the peak position remains constant (Fig S1. panel b).

## S2. Matrix-Assisted Laser Desorption Ionization – Time of Flight (MALDI-TOF)

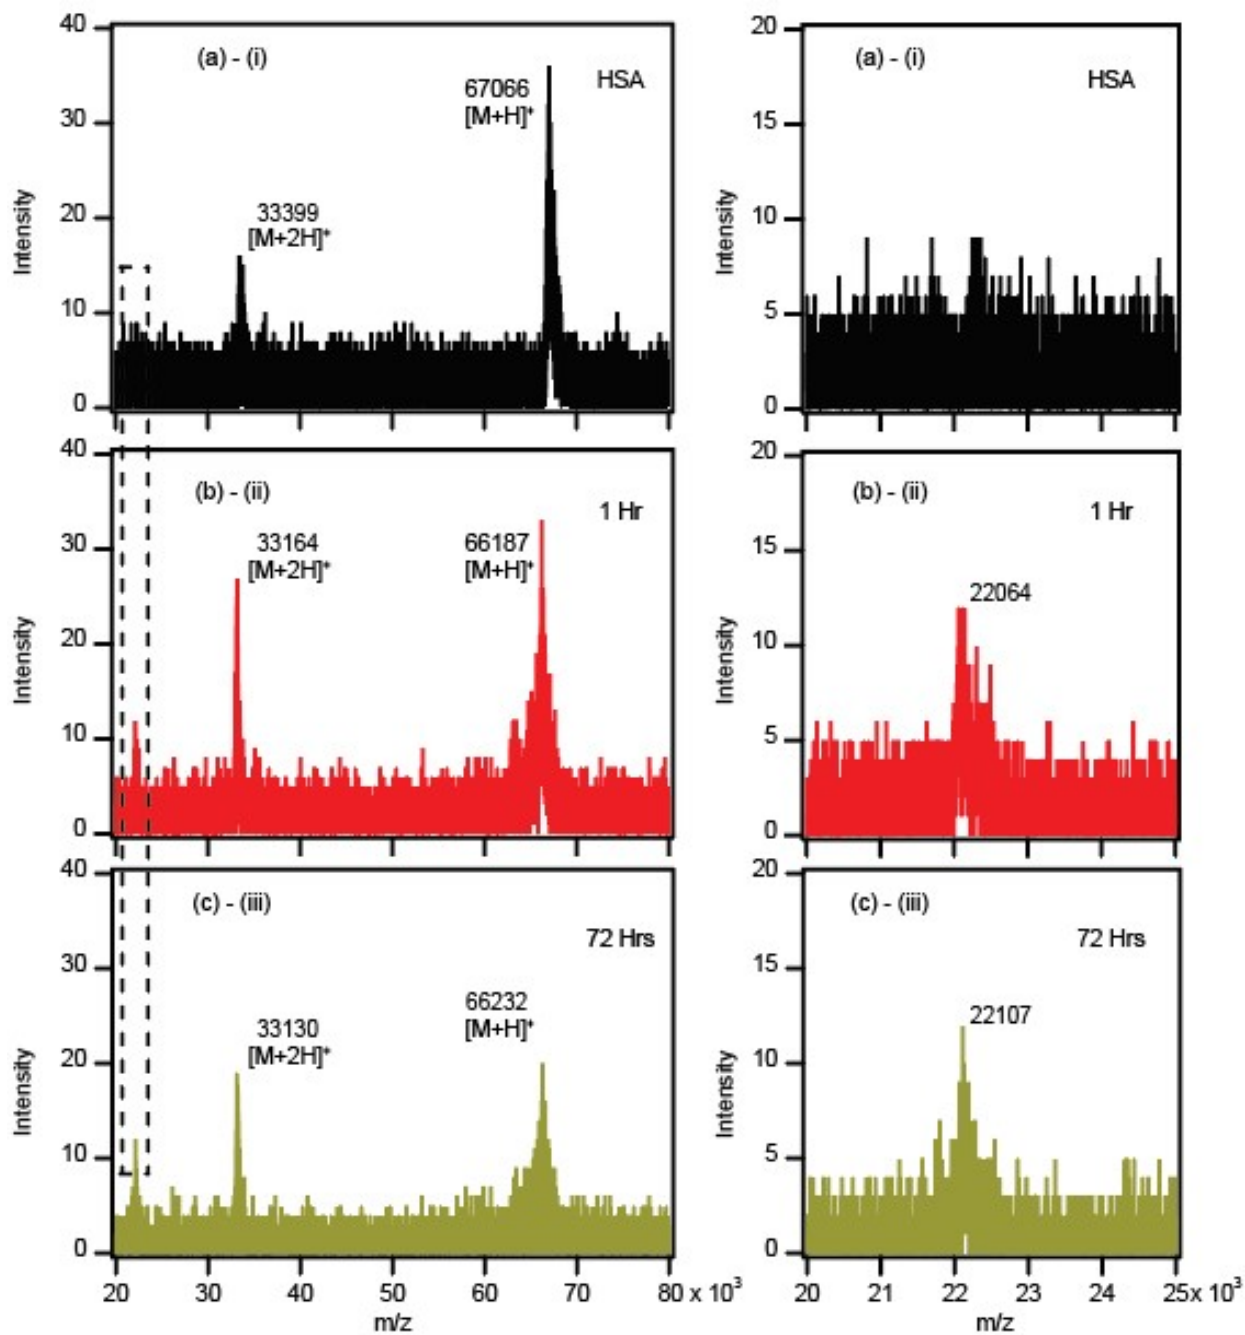

**Fig S2.** MALDI-TOF mass distribution of (a) bare HSA; (b) 1Hr oxidized sample; (c) 72Hr oxidized sample; subpanels are zoomed out of the dashed area.

MALDI-TOF mass distribution of bare HSA (Fig S2. panel a) and corresponding oxidized cases (Fig S2. 1 Hr (panel b) & 72 Hrs (panel c)). The  $m/z$  value changes with oxidation with an appearance of a prominent peak around  $\sim 22000$   $m/z$  with oxidation.
